# Supplementary material
Source: Springer Nature journal article supplement (https://www.springermedizin.de/resource/supplementary/13052_2013_551_MOESM1_ESM.pdf/9672024)

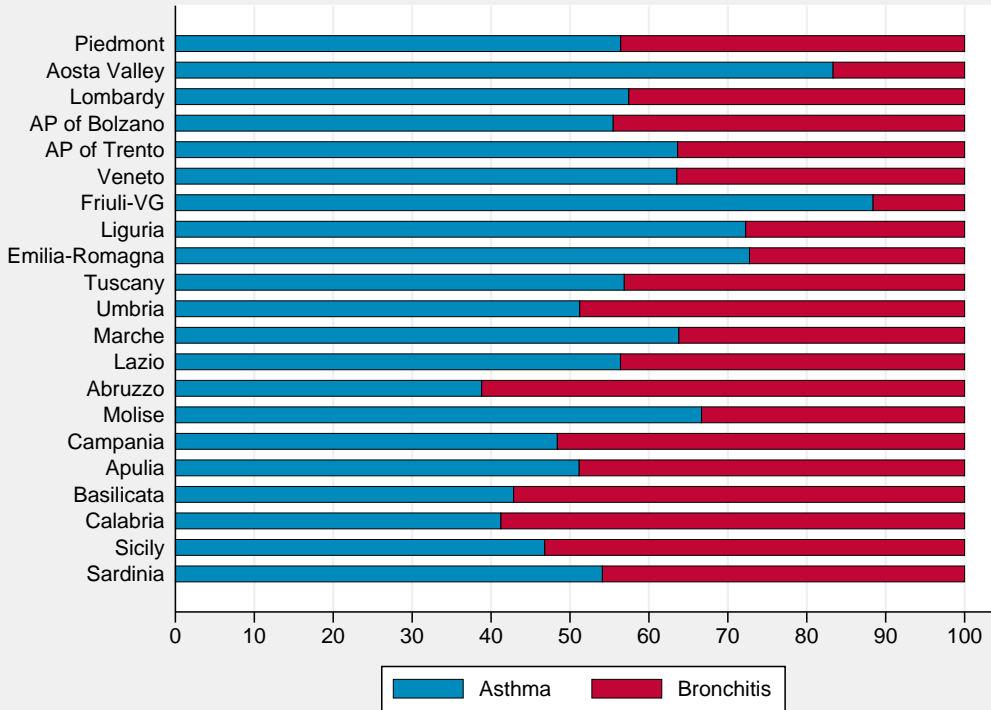

Supplement: MOESM1 [file 9672024]
